# Supplementary material for: Diversity and shifts of the bacterial community associated with Baikal sponge mass mortalities
Source: PubMed Central journal article supplement (PMC6438488; doi:10.1371/journal.pone.0213926), 2019-03-28
Supplement: pone.0213926.s002.pdf [file pone.0213926.s002.pdf]

# 1 **S1 Text. The validation of methodology**

## 3 **Supplementary material to the study:**

### 4 **Diversity and shifts of the bacterial community associated with Baikal sponge mass mortalities**

5 *authored by*

6 Sergei Belikov, Natalia Belkova, Tatiana Butina, Lubov Chernogor, Alexandra Martynova-Van Kley,  
7 Armen Nalian, Colin Rorex, Igor Khanaev, Olga Maikova, Sergey Feranchuk

9 The results of the statistical analysis are confirmed by the conclusions briefly listed below:

- 10 1. The applicability of rank-based and presence-based comparisons between samples sequenced by  
11 different technologies;
- 12 2. Increase of diversity and heterogeneity in samples collected in 2015;
- 13 3. The separation of samples collected in 2010, 2011 and 2015 by overall composition of microbiomes;
- 14 4. The compatibility of relative abundancies between two sequenced technologies for specific  
15 phylotypes after applying quantile normalization;
- 16 5. The separation between healthy and diseased samples in 2015 by overall composition of  
17 microbiomes and by abundance of some bacterial groups;
- 18 6. The presence of Chloroplast in the presented analysis does not prevent the assessment of the  
19 heterogeneity of bacterial species and their relative abundance.

20 Rarefaction curves, for samples obtained by different technologies shown in S1\_fig. The samples  
21 obtained by 454 technology are somewhat underrepresented, at average at 13% by Michaelis-Menten fit.  
22 The samples by Illumina technology are almost saturated, as it is natural due to higher sequencing depth.  
23 Shannon's diversity is relatively high for the 2015 samples (Fig 3 in the main text), and the observed  
24 separation between healthy and sick samples suggests that this measure is effective for describing the  
25 distribution of the number of the ecosystem being studied, despite the observed incomplete coverage. In  
26 addition, as the estimated Shannon diversity is relatively low for samples of 2010 and 2011 year, with  
27 sufficient coverage, rarefying this sample to level comparable to the 2015 samples will not significantly  
28 affect Shannon's diversity values and other integral properties of population size distributions. Therefore,  
29 the heterogeneity of sponges microbiomes did indeed increased in 2015 year relatively to previous  
30 observations.

31

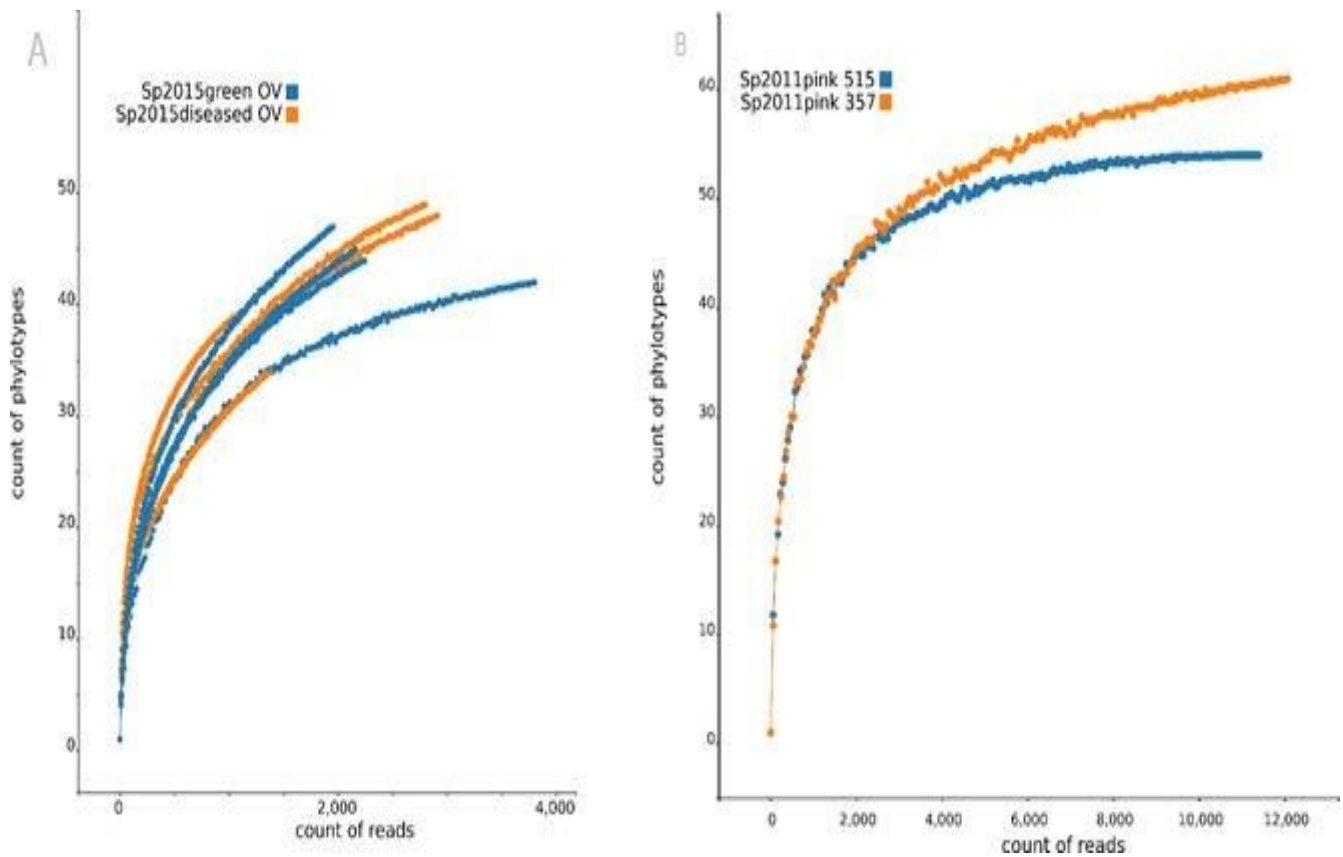

32

33 **S1\_fig. Rarefaction curves, at the level of family.** Results for (A) 7 samples from Olkhon Vorota area  
 34 collected in 2015 and sequenced using 454 technology. (B) Samples from 2011 year, collected near Olkhon  
 35 Island, amplified by two primer pairs and sequenced using Illumina technology.

36

37 The values of abundances are known to be incomparable for data obtained by two technologies.  
 38 The other ways to compare that data are to use presence/absence of some phylotype or to use rank of  
 39 phylotype for comparison. These ways indeed performed well as shown below.

40 Comparison between several measures of beta-diversity presented in S1 Table, in order to suggest  
 41 in which way the values of abundances for two technologies could be most compatible. Significance of  
 42 separations between groups of samples for healthy and diseased sponges shown in units of p-value. Matrix  
 43 of distances between the samples was processed using PERMANOVA approach with 4000 iterations to  
 44 get the p-value. Distances between samples were estimated from values of relative abundances, reduced  
 45 to a level of family in taxonomy. Several metrics used to calculate the distances as shown in S1 Table.

46

47 **S1 Table. The results of PERMANOVA function implemented in scikit-bio package.**

48

| Measure            | Open-ref (*) | Closed-ref | Closed-ref without Chloroplast |
|--------------------|--------------|------------|--------------------------------|
| Pearson            | 0.00925      | 0.0065     | 0.0005                         |
| Kendall            | 0.00025      | 0.00025    | 0.00025                        |
| Spearman           | 0.00775      | 0.00725    | 0.00075                        |
| Euclidean          | 0.003        | 0.002      | 0.00025                        |
| Bray-Curtis        | 0.00025      | 0.002      | 0.0005                         |
| Jaccard            | 0.00025      | 0.00025    | 0.00025                        |
| Morisita-Horn      | 0.0055       | 0.00275    | 0.00025                        |
| UniFrac-unweighted | 0.00025      | 0.00025    | 0.00025                        |
| UniFrac-weighted   | 0.00175      | 0.00175    | 0.00025                        |

49 (\*) the results estimated in p-value for QIIME open-reference OTU picking for the same dataset

50

51 In can be seen that UniFrac-unweighted measure and Jackard measure (S1 Table) which are  
52 based on the comparison of presence/absence of the phylotypes, are effective in separation of samples to  
53 healthy and diseased groups, when both groups contain samples obtained by two technologies. A  
54 Kendall measure of correlation, which is based on ranks of rows, could be transformed to the distances  
55 between samples just by a simple transformation:  $distance = 1 - correlation$ . It is also effective as  
56 measure of distance in separation of samples. The results shown in S1 Table support choice of closed-  
57 reference OTU picking strategy accepted in the study, as it provides more stable and consistent  
58 separation of samples, than the open-reference OTU picking.

59 Even the raw values of abundance allow comparing visually the compositions of microbiomes in  
60 sponges for data obtained by different sequencing methods S2\_fig.

61 A  
62 B  
63  
64  
65  
66

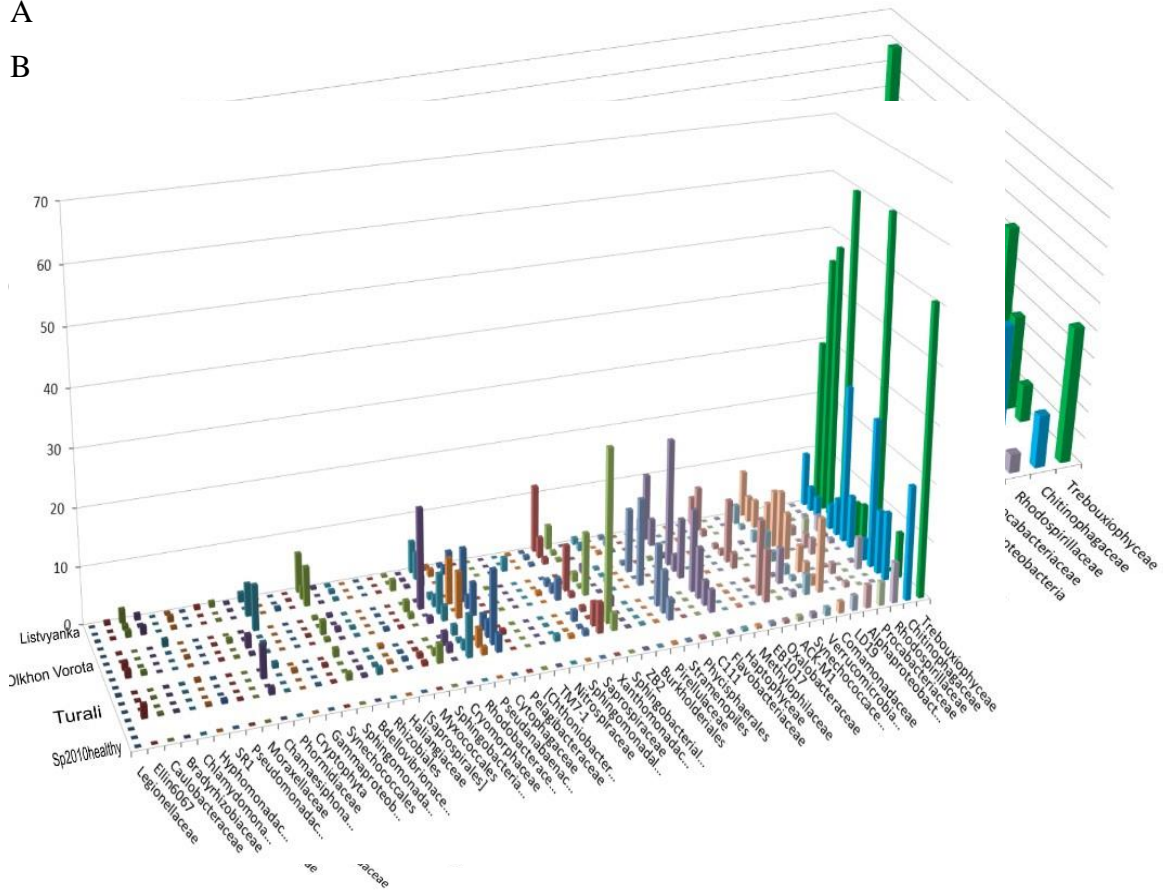

67  
68  
69  
70  
71 C  
72  
73  
74  
75  
76  
77  
78  
79  
80  
81  
82  
83

84 **S2\_fig. Composition of healthy sponges microbiomes.** (A) Healthy samples of 2015 sequenced by  
 85 454 and control Sp2010healthy sequenced by Illumina. (B) Diseased samples of 2015 sequenced by  
 86 454 and control Sp2010healthy sequenced by Illumina. (C) Comparison of abundances in microbiomes  
 87 of samples Sp2011-pink Sp2011green and Sp2010heathy sequenced by Illumina.

88

89 Dendrograms degree of proximity of microbiome compositions depending at the measurement  
 90 method used presented in S3\_fig. The composition of dominant species shown to be similar for the two  
 91 sequencing methods, but Kendall measure more clearly separates groups of healthy and diseased  
 92 sponges (S3A\_fig), as opposed to unweighed UniFrac measure (S3B\_fig). Shown, that the 2011  
 93 sponges are definitely different from Sp2010healthy sponges. The microbiome composition of the  
 94 healthy Sp2015green OV-r3 sponge, isolated in 2015, is close to the 2010 sponge microbiome, despite  
 95 the use of various sequencing methods. The same division into groups is observed in S2\_fig.

96

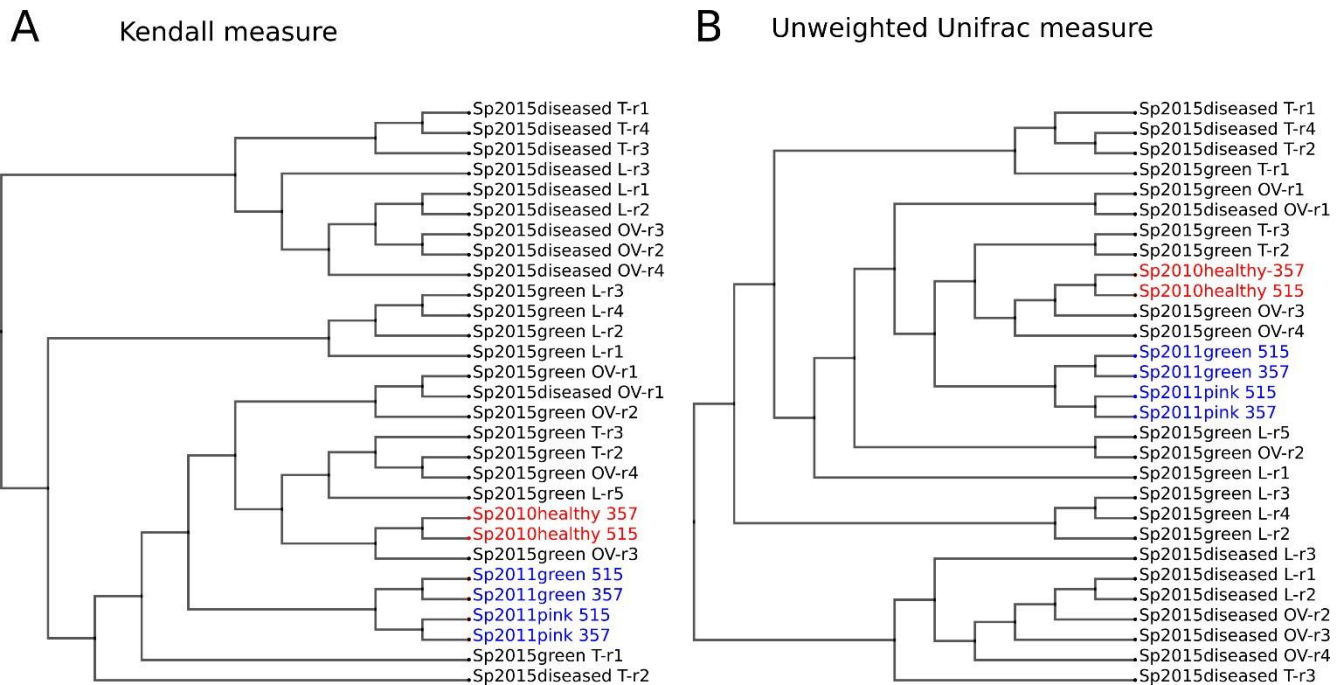

97

98

99 **S3\_fig. Dendrograms representing the degree of proximity between microbiome compositions.**

100 (A) Rank-based Kendall measure. (B) unweighed UniFrac measure. Abundance values in the samples  
 101 were used at a level of family; dendrograms were constructed using UPGMA clustering.

102

103 But to get more rigorous comparison of relative abundance of species in two periods, the  
 104 quantile normalization could be applied to table of abundances composed from both periods. In the

105 technique of quantile normalization, only a rank of each species is used to get the transformed values of  
 106 abundances. The good performance of Kendall correlation as a distance measure suggests that the  
 107 quantile transformation should improve the consistency between values of abundances.  
 108 The data for the same samples Sp2011pink, sequenced by two different technologies using three pairs  
 109 of primers are presented in S4\_fig. The previously published data on high levels of Cyanobacteria and  
 110 Verrucomicrobia in Sp2011pink are confirmed even for non-transformed values for both types of  
 111 sequencing. However, the incompatibility of numbers between the 454 and Illumina technologies is  
 112 clearly visible in the top row. Nevertheless, the distribution of phylotypes in samples looks much more  
 113 comparable after applying quantile normalization.

Raw abundances

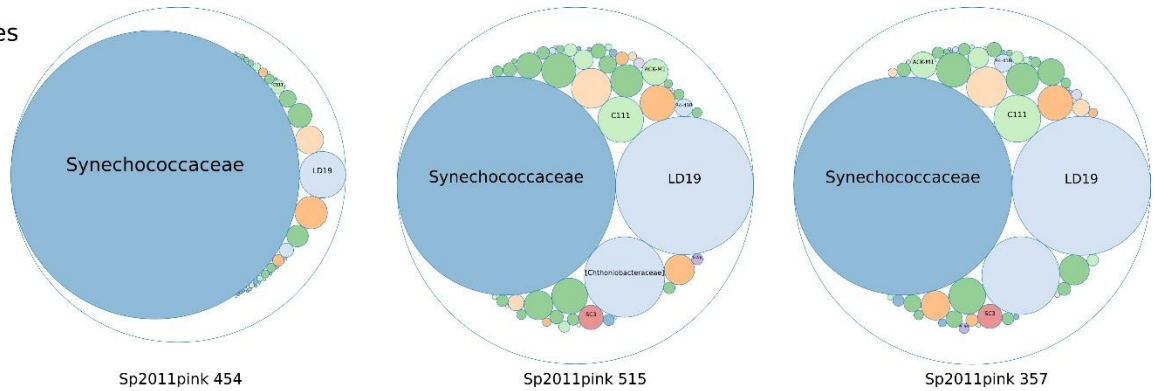

After quantile normalization

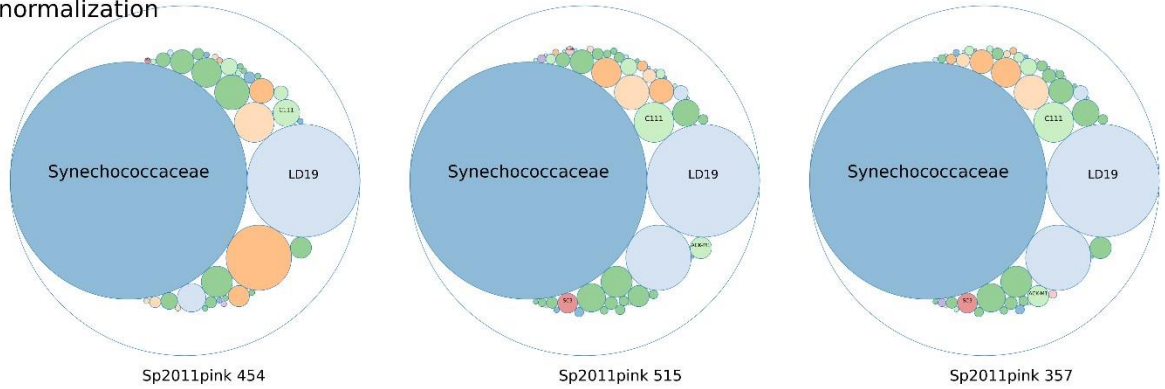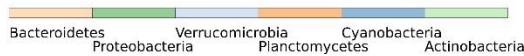

114  
 115

116 **S4\_fig. Bubble chart representing the influence of quantile normalization.** Data obtained using  
 117 three technologies for the same sample of pink sponge collected in 2011 before and after quantile  
 118 normalization.

119

120 To study a contribution of chloroplast species to a distribution of relative abundances, several  
 121 tests performed, as shown below. These trees demonstrate that the distribution of samples is similar,

122 whatever abundances for Chloroplasts taken into account or not (S5\_Fig). Samples of 2010 and 2011  
123 are in any case divided into both trees, which supports the hypothesis about the time of onset of the  
124 disease.

Chloroplasts included:

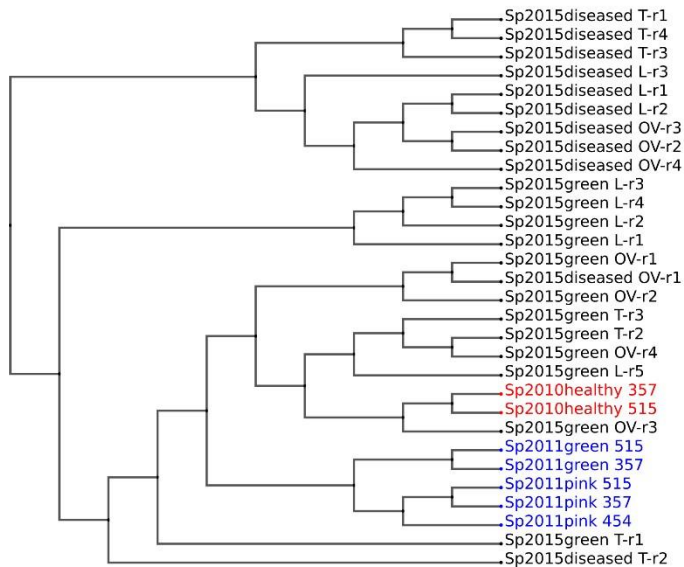

Chloroplasts excluded:

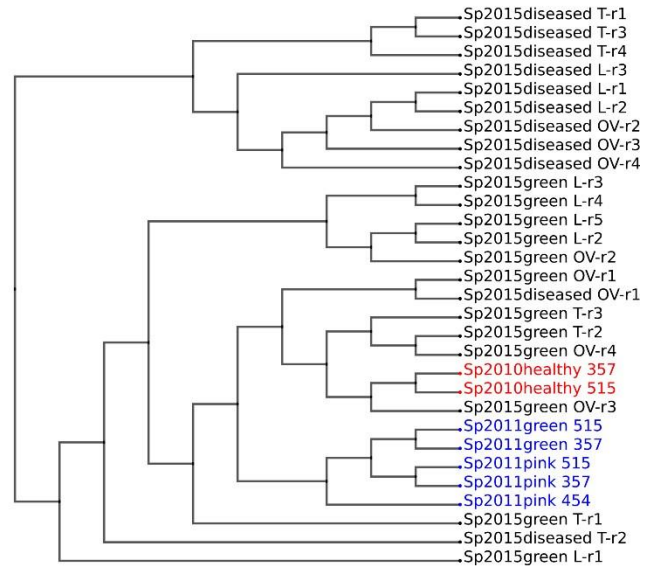

**S5\_fig. Dendrograms, constructed using a ranked Kendall measure.** Influence of presence or  
128 absence of Chloroplasts on proximity of the microbiomes composition: (A) Complete data. (B)  
129 Chloroplasts are excluded. The dendrograms constructed using UPGMA clustering; abundance in the  
130 samples used at the family level.

132 The separation between healthy (green) and diseased samples is also significant in both cases,  
133 Shannon index is higher in diseased samples, p-value = 0.001 on a level of family (S2 Table). The  
134 bacterial phylotypes specific to diseased samples and to healthy samples (S6\_fig) in both cases are also  
135 identified with a consistence to results shown in Fig 4 (main text). Chloroplast species contribute to  
136 relative abundance values, so the list of the most common phylotypes differs on two heatmaps (S6\_fig).  
137 However, this does not affect the observation of changes in microbial composition of the sponge  
138 samples discussed in the study.

139

Chloroplasts included:

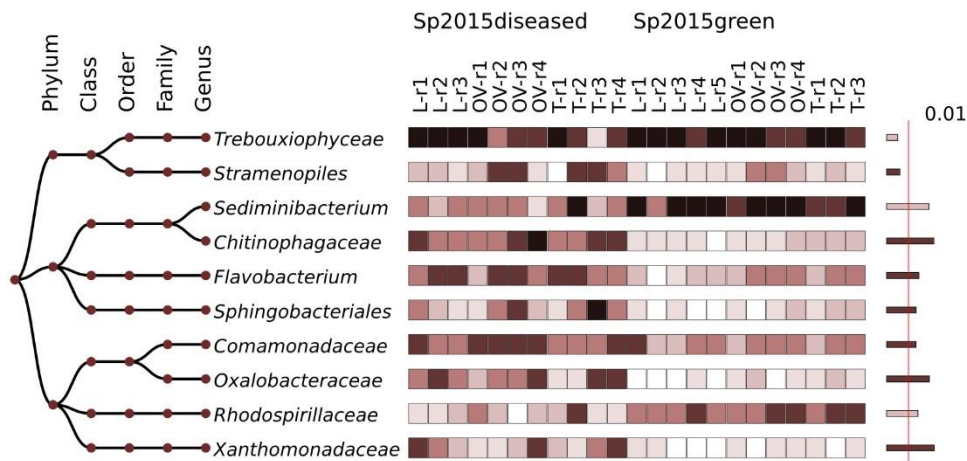

Chloroplasts excluded:

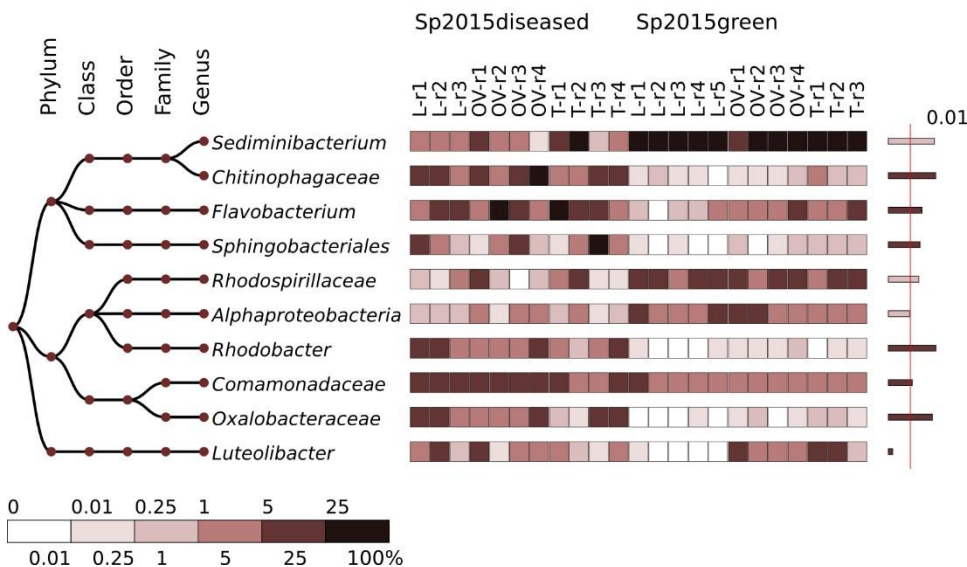

140

141

142 **S6\_fig. Heatmaps representing an effect of Chloroplast species on a separation of genera specific**  
 143 **to diseased sponges.** The columns on the right shows a significance difference between the healthy and  
 144 diseased samples estimated using Mann-Whitney test; width of the bars corresponds to  $-\ln(p\text{-value})$ .  
 145 Red line separates the significance level of 0.99 ( $p\text{-value} < 0.01$ ).

146

147 The analysis of third-party data of sponge microbiomes from coasts of New Guinea performed to  
 148 support the methodology used to compare mixing sequencing technologies. The dataset was composed  
 149 from raw sequencing reads deposited in projects PRJNA216132 (16S amplicon metagenome analysis of  
 150 three sponge species at CO2 seeps in Papua New Guinea) and PRJNA454201 (Sponge microbiome



151 responses to ocean acidification) [Kander et al., 2018]. The data in project PRJNA216132, submitted by  
 152 Australian Institute of Marine Sciences and RTL Genomics, was sequenced using 454 GS FLX+  
 153 pyrosequencer. 20 samples collected 27.08.2013 on control sites were used, png51c3-png60c3 for  
 154 *Stylissa massa* sponge and png21c1-png30c1 for *Coelocarteria singaporensis* sponge. The data on  
 155 project PRJNA454201, submitted by Victoria University of Wellington and Australian Centre for  
 156 Ecogenomics, was sequenced in Illumina MiSeq with paired layout. Four samples collected 22.11.2014  
 157 on control sites were used, SC6.2, SC5.2 for *Stylissa flabelliformis* sponge and FC6.2, FC5.2 for  
 158 *Coelocarteria singaporensis* sponge.

159 The 454 pyrosequencing reads were quality filtered and trimmed using mothur package, with  
 160 parameters 'maxambig=0, maxhomop=8, flip=T, bdiffs=1, pdiffs=2, qwindowaverage=25,  
 161 qwindowsize=50, minlength=150'. The Illumina pair-end reads were quality trimmed using Trimmomatic  
 162 (SLIDINGWINDOW:50:20 MINLEN:50) and merged using Flash software (-m 10 -x 0.2 -p 33 -r 300  
 163 -f 450 -s 150). The closed-reference OTU picking of the combined dataset was identical to the procedure  
 164 applied to combined dataset of Baikal sponge samples, as it described in Methods section in the main  
 165 text.

166 The *Stylissa* genus of sponges (Axinellidae) and *Coelocarteria singaporensis* sponges  
 167 (Isodictyidae) are closer in microbiome composition than the *L. baikalensis* sponges in two states of  
 168 disease. So, the variations between distance measures that separate two genera of sponges following same  
 169 PERMANOVA approach with 4000 iterations observed on higher level of taxonomic hierarchy, as shown  
 170 in S2 Table.

171

172 **S2 Table. The results of PERMANOVA function for sea sponges.**

| Level  | Pearson | Kendall | Spearman | Euclidean | Bray-Curtis | Jaccard | Morisita-Horn | UniFrac unweighted | UniFrac weighted |
|--------|---------|---------|----------|-----------|-------------|---------|---------------|--------------------|------------------|
| Family | 0.00025 | 0.00025 | 0.0005   | 0.008     | 0.00025     | 0.00025 | 0.0005        | 0.00025            | 0.0005           |
| Order  | 0.0085  | 0.00025 | 0.00625  | 0.01475   | 0.00025     | 0.00025 | 0.0105        | 0.00025            | 0.00025          |
| Class  | 0.0845  | 0.00025 | 0.07675  | 0.02025   | 0.00075     | 0.00025 | 0.0795        | 0.00025            | 0.0045           |

173

174 The dendrograms constructed for presentation of dataset at order level using the same average  
 175 linking and two measures of distance demonstrate that samples of both sponges' genera grouped  
 176 together and the biases are the corrections of second order (S7\_fig).

A Kendall measure

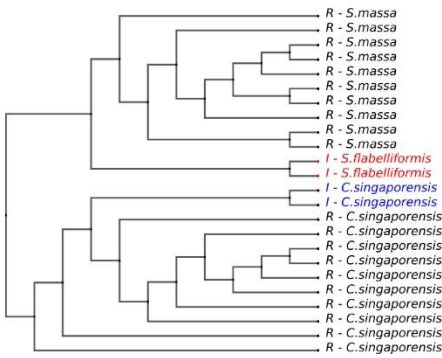

B Unweighted UniFrac measure

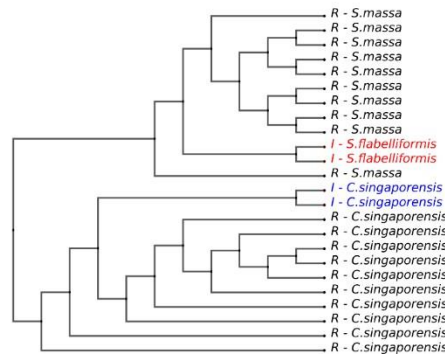

178

179

180 **S7\_fig. Dendrograms representing a degree of proximity between microbiome composition of**  
 181 **two marine sponges.** (A) Constructed using rank-based Kendall measure. (B) Presence-based  
 182 unweighed UniFrac measure. Abundance values in samples used at level of family and dendrograms  
 183 constructed using UPGMA clustering.

184

185 This could serve as additional support to the statement in the results section of the main text that  
 186 samples of healthy *L. baicalensis* sponge from 2010 year separated from both samples of 2011 year and  
 187 are close to some of healthy samples, collected in 2015 and sequenced using another technology.

188 In a similar way, the quantile normalization improves the separation of bacterial phylotypes  
 189 specific to each of the sponge genera (S8\_fig).

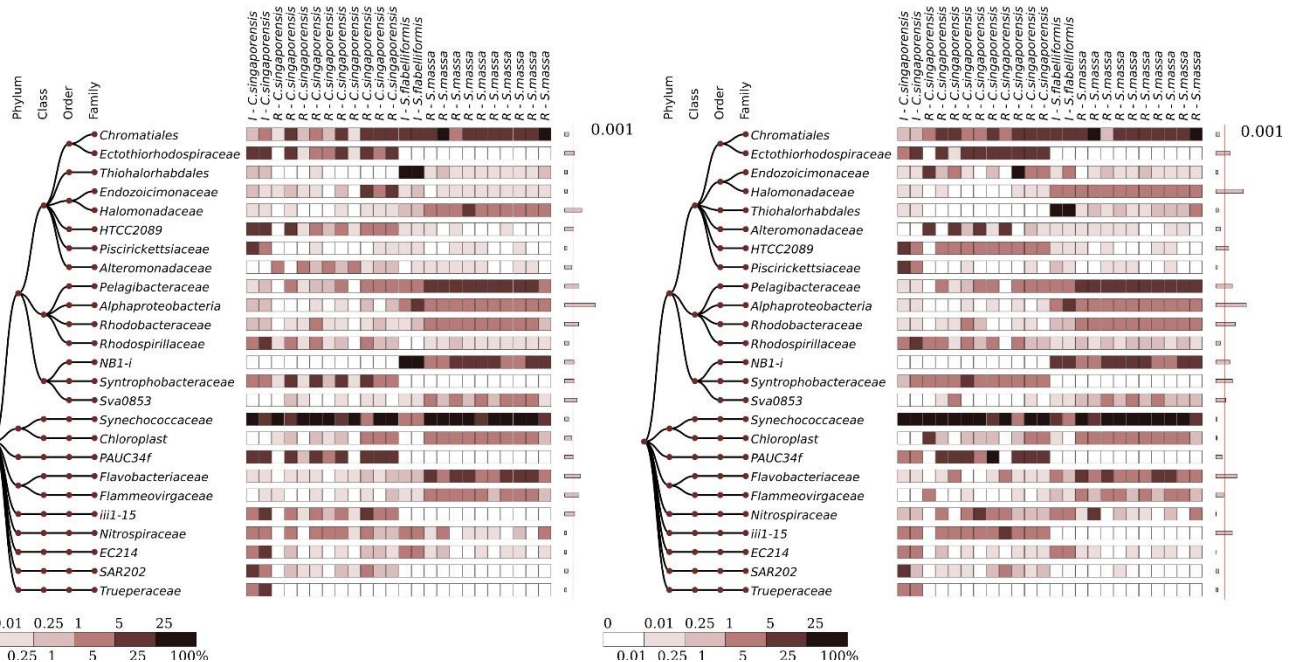

190

191

192 **S8\_fig. Heatmap of the 25 most abundant bacterial groups at the level of family.** (A) Raw  
193 abundances. (B) After quantile normalization. The column on the right shows a significance difference  
194 between the two genera of host sponges, estimated using Mann-Whitney test; width of the bars  
195 corresponds to  $-\ln(p\text{-value})$ . Red line separates the significance level of 0.999 ( $p\text{-value} < 0.001$ ).

196

197 The values of alpha-diversity for the combined dataset of the marine sponges provided at level of  
198 order in taxonomy for reference (S3Table).

199

200 **S3Table. The values of alpha-diversity for the combined dataset of the marine sponges.**

201

| SRA ID    | Sample ID | Total  | Unclassified | Ace   | Chao1 | Shannon | Simpson | OTU Number | Singletons | Doubletons |
|-----------|-----------|--------|--------------|-------|-------|---------|---------|------------|------------|------------|
| SRR957525 | png21c1   | 5483   | 2            | 16.13 | 12    | 0.2     | 0.05    | 10         | 4          | 2          |
| SRR957526 | png22c1   | 1273   | 221          | 27.27 | 27    | 3.01    | 0.82    | 25         | 4          | 2          |
| SRR957532 | png23c1   | 2636   | 9            | 16.33 | 16    | 0.41    | 0.09    | 16         | 1          | 4          |
| SRR957578 | png24c1   | 2724   | 312          | 39.34 | 37.5  | 2.29    | 0.6     | 35         | 6          | 5          |
| SRR957584 | png25c1   | 1548   | 22           | 17.04 | 16.5  | 0.83    | 0.2     | 16         | 2          | 1          |
| SRR957597 | png26c1   | 1718   | 458          | 25.9  | 25    | 2.88    | 0.81    | 24         | 3          | 2          |
| SRR957598 | png27c1   | 2984   | 1            | 18.11 | 21    | 0.25    | 0.06    | 11         | 5          | 0          |
| SRR957599 | png28c1   | 1715   | 320          | 28.65 | 28.5  | 3.32    | 0.85    | 27         | 3          | 1          |
| SRR957600 | png29c1   | 2278   | 205          | 28.19 | 27.2  | 2.62    | 0.72    | 27         | 2          | 4          |
| SRR957601 | png30c1   | 1428   | 157          | 31.54 | 31.33 | 2.86    | 0.78    | 28         | 5          | 2          |
| SRR958136 | png51c3   | 5424   | 355          | 44.13 | 46    | 3.07    | 0.79    | 41         | 6          | 2          |
| SRR958138 | png52c3   | 10562  | 687          | 52.63 | 52.5  | 2.84    | 0.75    | 50         | 5          | 3          |
| SRR958141 | png53c3   | 3814   | 284          | 47.03 | 46.5  | 3.18    | 0.81    | 43         | 7          | 5          |
| SRR958142 | png54c3   | 10892  | 652          | 63.77 | 69.33 | 3.2     | 0.82    | 51         | 11         | 2          |
| SRR958149 | png55c3   | 3730   | 183          | 55.67 | 59.25 | 3.35    | 0.86    | 48         | 10         | 3          |
| SRR958153 | png56c3   | 2890   | 166          | 45.66 | 52    | 2.93    | 0.79    | 40         | 9          | 2          |
| SRR958163 | png57c3   | 4181   | 318          | 40.37 | 39.5  | 3.13    | 0.8     | 37         | 5          | 3          |
| SRR958164 | png58c3   | 105342 | 6891         | 96.41 | 94.5  | 3.24    | 0.81    | 90         | 9          | 7          |

|            |         |       |      |       |        |      |      |    |    |   |
|------------|---------|-------|------|-------|--------|------|------|----|----|---|
| SRR958165  | png59c3 | 8230  | 531  | 56.33 | 55     | 3.15 | 0.81 | 49 | 9  | 5 |
| SRR958166  | png60c3 | 5498  | 161  | 38.85 | 39     | 2.22 | 0.6  | 37 | 4  | 2 |
| SRR7081699 | SC5.2   | 13118 | 609  | 109.2 | 112.25 | 2.3  | 0.71 | 49 | 23 | 3 |
| SRR7081700 | SC6.2   | 28300 | 1935 | 61.07 | 61     | 2.47 | 0.74 | 52 | 10 | 4 |
| SRR7081710 | FC5.2   | 15958 | 3145 | 52.2  | 46.75  | 4.11 | 0.93 | 43 | 6  | 3 |
| SRR7081709 | FC6.2   | 6694  | 1396 | 40.95 | 45     | 3.81 | 0.88 | 35 | 5  | 0 |

202

203

204 Details of implementation, fragments of code in Python 2.7 and bash provided to explain the features of  
205 downstream analysis.

206

207 **Rarefaction and Michaelis-Menten fit:**

208

209 #input: si - sorted list of abundance values

210 #output: xvals, yvals - rarefaction chart; mparams - parameters and precision of Michaelis-Menten fit

211

212 import skbio.stats as skstats

213 from scipy.optimize import fmin\_powell

214

215 n\_indiv = sum( si )

216 n\_otu = len( si ) def

217 subsample( si, i ):

218 ssi = skstats.subsample\_counts( si, i ) return

219 np.count\_nonzero( ssi ) def errfn(p, n, y):

220 return ( ( ( p[0] \* n / (p[1] + n) ) - y ) \*\* 2 ).sum()

221 i\_step = max( n\_indiv / 200, 1 ) num\_repeats = max(

222 2000 / i\_step, 1 )

223 print >>sys.stderr, ( i\_step, num\_repeats )

224 S\_max\_guess = n\_otu

225 B\_guess = int( round( n\_otu / 2 ) ) params\_guess

226 = ( S\_max\_guess, B\_guess ) xvals = np.arange(

227 1, n\_indiv, i\_step )

228 ymtx = np.empty( ( num\_repeats, len( xvals ) ), dtype=int ) for

229 i in range( num\_repeats ):

230 ymtx[i] = np.asarray( [ subsample( si, n ) for n in xvals ], dtype=int ) yvals

231 = ymtx.mean(0)

232 params\_guess = ( n\_otu, int( round( n\_otu / 2 ) ) )

233 mparams = fmin\_powell( errfn, params\_guess, ftol=1e-5, args=(xvals, yvals), disp = False )

234

235 **Quantile normalization:**

236

```

237 #input: matrix - matrix of relative abundances
238 #output: df - transformed matrix of relative abundances
239
240 import numpy as np
241
242 def quantileNormalize( matrix ):
243     df = copy.copy( matrix )
244     dic = {} for col in range( len( df )
245 ):     dic.update({col :
246 sorted(df[col])) rank = [ 0 ] * len(
247 df[0] ) for i in range( len( rank ) ):
248 rank[ i ] = np.average( [ dic[ col ][ i ] for col in range( len( df ) ) ] ) for col in range(
249 len( df ) ):     t = np.searchsorted( np.sort(df[col]), df[col] )     df[col] = [ rank[i]
250 for i in t ]
251     return df
252

```

## 253 **Reduction of dataset:**

```

254
255 #input: data (double list of strings), ml (integer) - representation of raw data on OTU level; ilevel - level of reduction in taxonomic hierarchy;
256 kdicit - taxonomic assignments in that level; findex (list of intergers), gtags (distionary) - pre-defined distribution of samples into groups;
257 #output: edata - matrix of absolute abundance counts, distributed to groups and in a reduced level of taxonomy
258 def load_edata( data, ilevel, ml, kdicit, findex, gtags
259 ):
260     edata = [] for tagnum in sorted( gtags.values() ):
261     cgtag = gtags.keys()[ gtags.values().index( tagnum ) ]
262     crow = [ 0 ] * len( kdicit ) for i in sorted( findex ):
263     if findex[i] == cgtag: for d
264 in data[1:]: if len( d ) < max(
265 findex.keys() ) + ml:
266     continue
267     ckey = "".join( d[0:ilevel] ) if ckey in kdicit:
268     cind = kdicit[ ckey ]
269     v = int( float( d[ i + ml + 1 ] ) )
270     crow[ cind ] += v
271     edata.append( crow )
272     return edata
273

```

## 274 **Selection of most abundant phylotypes:**

```

275
276 #input: edata - matrix of absolute abundance counts; num_best - number of taxonomic units to select; kdicit - taxonomic assignments for rows
277 in input matrix
278 #output: nedata - matrix of absolute abundance counts for num_best most abundant units; nkdict - taxonomic assignments for the selected
279 abundant units
280
281 import numpy as np

```

```
282
283 def select_toptax( edata, kdict, num_best ):  aedata = np.array( edata, dtype=float )
284     aenorm = np.maximum( np.sum( aedata, axis=1 ), np.array( [ 1. / len( edata[0] ] * len( edata ) ) )
285 aedata /= aenorm.reshape( len(edata), 1 )  ssum = np.sum( aedata, axis=0 )
286     ssorted = sorted( ssum.tolist(), reverse=True )
287     smax = ssorted[ num_best ]  nkdict = {}  nedata =
288 []  tcnt = 0  for key in kdict:      if ssum[ kdict[key]
289 ] > smax and tcnt < num_best:      for k in
290 range( len( edata ) ):      if tcnt == 0:
291     nedata.append( [] )
292 nedata[k].append( edata[k][ kdict[key] ] )
293     nkdict[ key ] = tcnt
294 tcnt += 1
295     return ( nedata, nkdict )
296
```

### 297 **Functional annotation (fragment of script in bash):**

```
298
299 source activate qiime1
300 filter_samples_from_otu_table.py -i otu_table.biom -o picrust_input.biom -n 1
301 normalize_by_copy_number.py -i picrust_input.biom -o normalized_otus.biom
302 predict_metagenomes.py -i normalized_otus.biom -o picrust.biom
```
