# Supplementary material for: Diversity and shifts of the bacterial community associated with Baikal sponge mass mortalities
Source: PubMed Central journal article supplement (PMC6438488; doi:10.1371/journal.pone.0213926), 2019-03-28
Supplement: pone.0213926.s006.pdf [file pone.0213926.s006.pdf]

**S2 Table. Values for alpha-diversity and estimates of significance for differences between diversity indices.**

*Supplementary material to the study*

**Diversity and shifts of the bacterial community associated with Baikal sponge mass mortalities**

*authored by*

Sergei Belikov, Natalia Belkova, Tatiana Butina, Lubov Chernogor, Alexandra Martynova-Van Kley, Armen Nalian, Colin Rorex, Igor Khanaev, Olga Maikova, Sergey Feranchuk

**1. Alpha-diversity:**

1.1 Level of Family expanded:

1.1a Chloroplast included:

Illumina:

| *                 | Total | Unclassified | Ace   | Chao1 | Shannon | Simpson | OTU Number | Michaelis-Menten | Singletons | Doubletons |
|-------------------|-------|--------------|-------|-------|---------|---------|------------|------------------|------------|------------|
| Sp2011pink 357    | 12079 | 599          | 65.73 | 64    | 2.54    | 0.67    | 61         | 62.27            | 7          | 6          |
| Sp2011pink 515    | 11412 | 536          | 54    | 54    | 2.54    | 0.67    | 54         | 55.81            | 0          | 7          |
| Sp2010healthy 357 | 61354 | 4357         | 58.77 | 58.25 | 2.33    | 0.64    | 58         | 58.51            | 2          | 3          |
| Sp2010healthy 515 | 57440 | 4130         | 59.03 | 61    | 2.36    | 0.65    | 58         | 58.34            | 3          | 0          |
| Sp2011green 357   | 49710 | 1777         | 55.87 | 54.86 | 1.98    | 0.58    | 54         | 56.02            | 4          | 6          |
| Sp2011green 515   | 47067 | 1699         | 50.3  | 50    | 2.01    | 0.59    | 50         | 51.86            | 1          | 7          |

454:

| *                    | Total | Unclassified | Ace    | Chao1 | Shannon | Simpson | OTU Number | Michaelis-Menten | Singletons | Doubletons |
|----------------------|-------|--------------|--------|-------|---------|---------|------------|------------------|------------|------------|
| Sp2011diseased L-r1  | 1518  | 116          | 49.22  | 46.36 | 3.67    | 0.86    | 45         | 49.15            | 6          | 10         |
| Sp2011diseased L-r2  | 2007  | 76           | 47.79  | 46    | 2.97    | 0.74    | 42         | 45.68            | 8          | 6          |
| Sp2011diseased L-r3  | 2032  | 67           | 64.51  | 60.6  | 3.04    | 0.7     | 54         | 59.43            | 12         | 9          |
| Sp2011diseased OV-r1 | 2806  | 98           | 58.38  | 55.6  | 2.24    | 0.56    | 49         | 56.14            | 12         | 9          |
| Sp2011diseased OV-r2 | 1379  | 211          | 53.76  | 43.17 | 3.32    | 0.86    | 34         | 36.49            | 11         | 5          |
| Sp2011diseased OV-r3 | 1059  | 363          | 47.59  | 44.14 | 3.87    | 0.91    | 39         | 42.1             | 9          | 6          |
| Sp2011diseased OV-r4 | 2914  | 228          | 63.85  | 56.25 | 3.58    | 0.86    | 48         | 50.24            | 12         | 7          |
| Sp2011diseased T-r1  | 4545  | 40           | 63.85  | 62.33 | 2.22    | 0.58    | 55         | 62.13            | 12         | 8          |
| Sp2011diseased T-r2  | 2245  | 307          | 93.79  | 98    | 3.91    | 0.87    | 77         | 89.53            | 22         | 10         |
| Sp2011diseased T-r3  | 2953  | 1274         | 63.34  | 79    | 3.31    | 0.85    | 44         | 47.32            | 15         | 2          |
| Sp2011diseased T-r4  | 3283  | 475          | 94.64  | 94.1  | 4.51    | 0.93    | 85         | 92.31            | 14         | 9          |
| Sp2015green L-r1     | 4122  | 232          | 92.34  | 78.3  | 2.17    | 0.67    | 53         | 67.87            | 23         | 9          |
| Sp2015green L-r2     | 4579  | 35           | 28.82  | 29.25 | 0.56    | 0.14    | 24         | 29.08            | 7          | 3          |
| Sp2015green L-r3     | 4788  | 92           | 67.93  | 59.91 | 1.59    | 0.56    | 49         | 61.55            | 16         | 10         |
| Sp2015green L-r4     | 2591  | 67           | 42.41  | 42.25 | 1.76    | 0.53    | 31         | 35.47            | 10         | 3          |
| Sp2015green L-r5     | 4067  | 184          | 53.86  | 47.14 | 1.78    | 0.59    | 36         | 44.42            | 13         | 6          |
| Sp2015green OV-r1    | 3807  | 238          | 46.04  | 47.25 | 1.83    | 0.45    | 42         | 45.81            | 7          | 3          |
| Sp2015green OV-r2    | 2251  | 187          | 54.12  | 55    | 2.55    | 0.7     | 44         | 48.82            | 12         | 5          |
| Sp2015green OV-r3    | 2168  | 177          | 61.6   | 71.25 | 2.3     | 0.59    | 45         | 51.26            | 15         | 3          |
| Sp2015green OV-r4    | 1957  | 168          | 67.76  | 64.5  | 2.93    | 0.75    | 47         | 52.73            | 15         | 5          |
| Sp2015green T-r1     | 4624  | 133          | 101.08 | 105.3 | 2.22    | 0.54    | 80         | 93.44            | 23         | 9          |
| Sp2015green T-r2     | 1868  | 101          | 73.51  | 74.5  | 3.16    | 0.8     | 49         | 54.74            | 18         | 5          |
| Sp2015green T-r3     | 5385  | 293          | 100.5  | 89.1  | 3.2     | 0.81    | 66         | 73.03            | 22         | 9          |

**1.1b Chloroplast excluded:**

Illumina:

| *                 | Total | Unclassified | Ace   | Chao1 | Shannon | Simpson | OTU Number | Michaelis-Menten | Singletons | Doubletons |
|-------------------|-------|--------------|-------|-------|---------|---------|------------|------------------|------------|------------|
| Sp2011pink 357    | 12052 | 589          | 61.25 | 60.14 | 2.52    | 0.67    | 58         | 62.27            | 6          | 6          |
| Sp2011pink 515    | 11386 | 527          | 52    | 52    | 2.52    | 0.66    | 52         | 55.81            | 0          | 7          |
| Sp2010healthy 357 | 26890 | 3825         | 53.81 | 53.25 | 2.88    | 0.74    | 53         | 58.51            | 2          | 3          |
| Sp2010healthy 515 | 25344 | 3577         | 54.12 | 56    | 2.92    | 0.74    | 53         | 58.34            | 3          | 0          |
| Sp2011green 357   | 18756 | 1605         | 50.24 | 49.5  | 2.62    | 0.75    | 49         | 56.02            | 3          | 5          |
| Sp2011green 515   | 18081 | 1540         | 46.32 | 46    | 2.63    | 0.75    | 46         | 51.86            | 1          | 7          |

454:

| *                    | Total | Unclassified | Ace   | Chao1 | Shannon | Simpson | OTU Number | Michaelis-Menten | Singletons | Doubletons |
|----------------------|-------|--------------|-------|-------|---------|---------|------------|------------------|------------|------------|
| Sp2011diseased L-r1  | 1044  | 110          | 45.47 | 42.91 | 3.98    | 0.91    | 42         | 45.99            | 5          | 10         |
| Sp2011diseased L-r2  | 1028  | 62           | 45.79 | 44    | 3.75    | 0.89    | 40         | 44.12            | 8          | 6          |
| Sp2011diseased L-r3  | 954   | 62           | 61.81 | 58.33 | 4.3     | 0.92    | 51         | 55.96            | 12         | 8          |
| Sp2011diseased OV-r1 | 964   | 80           | 56.38 | 53.6  | 3.67    | 0.87    | 47         | 54.89            | 12         | 9          |
| Sp2011diseased OV-r2 | 1168  | 34           | 51.76 | 41.17 | 3.07    | 0.83    | 32         | 35.4             | 11         | 5          |
| Sp2011diseased OV-r3 | 796   | 189          | 45.59 | 42.14 | 3.76    | 0.9     | 37         | 40.87            | 9          | 6          |
| Sp2011diseased OV-r4 | 2704  | 224          | 63.38 | 54.25 | 3.45    | 0.85    | 46         | 48.29            | 12         | 7          |
| Sp2011diseased T-r1  | 1700  | 40           | 62.85 | 61.33 | 3.38    | 0.81    | 54         | 61.51            | 12         | 8          |
| Sp2011diseased T-r2  | 1830  | 134          | 89.93 | 93    | 3.67    | 0.83    | 72         | 85.45            | 22         | 10         |
| Sp2011diseased T-r3  | 2710  | 1037         | 63.75 | 76    | 3.13    | 0.82    | 41         | 44.37            | 15         | 2          |
| Sp2011diseased T-r4  | 2879  | 357          | 92.64 | 92.1  | 4.41    | 0.92    | 83         | 90.95            | 14         | 9          |
| Sp2015green L-r1     | 2422  | 220          | 89.33 | 78.11 | 1.98    | 0.54    | 50         | 65.87            | 23         | 8          |
| Sp2015green L-r2     | 343   | 33           | 23.7  | 23.5  | 2.29    | 0.63    | 21         | 25.59            | 5          | 3          |
| Sp2015green L-r3     | 2154  | 81           | 66.4  | 57.33 | 1.26    | 0.29    | 44         | 55.39            | 16         | 8          |
| Sp2015green L-r4     | 2080  | 60           | 38.26 | 36    | 1.27    | 0.34    | 27         | 30.65            | 9          | 3          |
| Sp2015green L-r5     | 2833  | 180          | 49.54 | 42.43 | 1.27    | 0.35    | 33         | 41.23            | 12         | 6          |
| Sp2015green OV-r1    | 1002  | 231          | 44.25 | 45.25 | 3.74    | 0.88    | 40         | 43.92            | 7          | 3          |
| Sp2015green OV-r2    | 1330  | 156          | 52.12 | 53    | 2.52    | 0.6     | 42         | 47.79            | 12         | 5          |
| Sp2015green OV-r3    | 1844  | 153          | 56.68 | 64.75 | 1.92    | 0.47    | 42         | 48.9             | 14         | 3          |

|                   |      |     |       |       |      |      |    |       |    |   |
|-------------------|------|-----|-------|-------|------|------|----|-------|----|---|
| Sp2015green OV-r4 | 1591 | 152 | 65.46 | 64    | 2.67 | 0.66 | 43 | 48.53 | 15 | 4 |
| Sp2015green T-r1  | 1543 | 123 | 94.43 | 97    | 3.83 | 0.84 | 76 | 89.09 | 21 | 9 |
| Sp2015green T-r2  | 1164 | 83  | 73.89 | 74.6  | 3.4  | 0.83 | 44 | 49.07 | 18 | 4 |
| Sp2015green T-r3  | 4542 | 250 | 96.51 | 86.67 | 2.98 | 0.76 | 61 | 68.78 | 22 | 8 |

## 1.2 Shannon index, all levels (chloroplasts included):

| *                    | OTU  | Species | Genus | Family | Order | Class | Phylum |
|----------------------|------|---------|-------|--------|-------|-------|--------|
| Sp2011pink 357       | 3.42 | 2.59    | 2.59  | 2.54   | 2.45  | 2.34  | 1.83   |
| Sp2011pink 515       | 3.49 | 2.58    | 2.58  | 2.54   | 2.45  | 2.33  | 1.82   |
| Sp2011diseased L-r1  | 5.09 | 4.01    | 3.94  | 3.67   | 3.37  | 2.81  | 1.67   |
| Sp2011diseased L-r2  | 4.3  | 3.25    | 3.17  | 2.97   | 2.69  | 2.38  | 1.67   |
| Sp2011diseased L-r3  | 3.98 | 3.28    | 3.22  | 3.04   | 2.88  | 2.45  | 1.6    |
| Sp2011diseased OV-r1 | 2.8  | 2.34    | 2.33  | 2.24   | 2.14  | 1.92  | 1.25   |
| Sp2011diseased OV-r2 | 5.5  | 3.61    | 3.49  | 3.32   | 2.73  | 2.53  | 1.46   |
| Sp2011diseased OV-r3 | 6.22 | 4.23    | 4.18  | 3.87   | 3.63  | 3.1   | 1.7    |
| Sp2011diseased OV-r4 | 5.38 | 3.76    | 3.72  | 3.58   | 3.15  | 2.74  | 1.6    |
| Sp2011diseased T-r1  | 2.99 | 2.38    | 2.36  | 2.22   | 2.14  | 2.01  | 1.42   |
| Sp2011diseased T-r2  | 5.51 | 4.19    | 4.15  | 3.91   | 3.54  | 2.98  | 1.86   |
| Sp2011diseased T-r3  | 4.89 | 3.47    | 3.44  | 3.31   | 3.06  | 2.94  | 1.35   |
| Sp2011diseased T-r4  | 6.68 | 4.86    | 4.83  | 4.51   | 4.02  | 3.31  | 1.93   |
| Sp2010healthy 357    | 2.56 | 2.35    | 2.35  | 2.33   | 2.26  | 2.04  | 1.72   |
| Sp2010healthy 515    | 2.6  | 2.39    | 2.39  | 2.36   | 2.3   | 2.07  | 1.73   |
| Sp2011green 357      | 2.34 | 1.99    | 1.99  | 1.98   | 1.96  | 1.87  | 1.23   |
| Sp2011green 515      | 2.38 | 2.01    | 2.01  | 2.01   | 1.98  | 1.9   | 1.25   |
| Sp2015green L-r1     | 2.4  | 2.19    | 2.19  | 2.17   | 2.11  | 1.9   | 1.59   |
| Sp2015green L-r2     | 0.65 | 0.56    | 0.56  | 0.56   | 0.55  | 0.52  | 0.49   |
| Sp2015green L-r3     | 1.73 | 1.6     | 1.6   | 1.59   | 1.56  | 1.47  | 1.35   |
| Sp2015green L-r4     | 1.98 | 1.78    | 1.78  | 1.76   | 1.7   | 1.57  | 1.33   |
| Sp2015green L-r5     | 1.94 | 1.8     | 1.79  | 1.78   | 1.74  | 1.62  | 1.42   |
| Sp2015green OV-r1    | 2.08 | 1.85    | 1.85  | 1.83   | 1.76  | 1.56  | 1.31   |
| Sp2015green OV-r2    | 3.02 | 2.62    | 2.61  | 2.55   | 2.45  | 2.16  | 1.83   |
| Sp2015green OV-r3    | 2.68 | 2.35    | 2.35  | 2.3    | 2.23  | 1.99  | 1.6    |

|                   |      |      |      |      |      |      |      |
|-------------------|------|------|------|------|------|------|------|
| Sp2015green OV-r4 | 3.69 | 3.03 | 3.03 | 2.93 | 2.77 | 2.57 | 1.93 |
| Sp2015green T-r1  | 2.69 | 2.31 | 2.31 | 2.22 | 2.11 | 1.93 | 1.43 |
| Sp2015green T-r2  | 3.94 | 3.27 | 3.27 | 3.16 | 3.02 | 2.81 | 2.07 |
| Sp2015green T-r3  | 4.15 | 3.29 | 3.29 | 3.2  | 3.03 | 2.74 | 1.88 |

## 2. Significance of separation between subsets of samples, in units of p-value

### 2.1 Chloroplasts included:

2.1.1 healthy 2010 + healthy2011 + diseased2011 + healthy2015 + diseased2015 / anova

| Level   | Ace   | Chao1 | Shannon | Simpson | OTU Number |
|---------|-------|-------|---------|---------|------------|
| OTU     | 0.033 | 0.041 | 0       | 0.026   | 0.015      |
| Species | 0.64  | 0.602 | 0.002   | 0.041   | 0.332      |
| Genus   | 0.693 | 0.691 | 0.003   | 0.044   | 0.428      |
| Family  | 0.911 | 0.955 | 0.005   | 0.046   | 0.771      |
| Order   | 0.95  | 0.975 | 0.014   | 0.077   | 0.953      |
| Class   | 0.995 | 0.985 | 0.026   | 0.095   | 0.646      |
| Phylum  | 0.819 | 0.877 | 0.378   | 0.324   | 0.746      |

2.1.2 healthy2015 + diseased2015 / ranked test

| Level   | Ace   | Chao1 | Shannon | Simpson | OTU Number |
|---------|-------|-------|---------|---------|------------|
| OTU     | 0.005 | 0.005 | 0       | 0.002   | 0.002      |
| Species | 0.104 | 0.186 | 0       | 0.003   | 0.012      |
| Genus   | 0.17  | 0.221 | 0.001   | 0.003   | 0.018      |
| Family  | 0.391 | 0.415 | 0.001   | 0.003   | 0.269      |
| Order   | 0.439 | 0.391 | 0.002   | 0.004   | 0.379      |
| Class   | 0.488 | 0.403 | 0.003   | 0.005   | 0.239      |
| Phylum  | 0.24  | 0.239 | 0.322   | 0.322   | 0.426      |

2.1.3 2015 Listvyanka + Olkhon Vorota + Turali / anova

| Level   | Ace   | Chao1 | Shannon | Simpson | OTU Number |
|---------|-------|-------|---------|---------|------------|
| OTU     | 0.001 | 0     | 0.114   | 0.171   | 0.003      |
| Species | 0.027 | 0.002 | 0.114   | 0.201   | 0.004      |
| Genus   | 0.033 | 0.002 | 0.099   | 0.198   | 0.003      |
| Family  | 0.003 | 0     | 0.087   | 0.203   | 0.001      |
| Order   | 0.001 | 0.001 | 0.076   | 0.208   | 0.001      |
| Class   | 0.001 | 0.001 | 0.04    | 0.197   | 0.002      |
| Phylum  | 0.099 | 0.035 | 0.172   | 0.537   | 0.009      |

## 2.2 Chloroplasts excluded:

2.2.1 healthy 2010 + healthy2011 + diseased2011 + healthy2015 + diseased2015 / anova:

| Level   | Ace   | Chao1 | Shannon | Simpson | OTU Number |
|---------|-------|-------|---------|---------|------------|
| OTU     | 0.038 | 0.052 | 0       | 0.001   | 0.019      |
| Species | 0.558 | 0.538 | 0.001   | 0.003   | 0.263      |
| Genus   | 0.617 | 0.629 | 0.001   | 0.003   | 0.35       |
| Family  | 0.849 | 0.923 | 0.004   | 0.004   | 0.724      |
| Order   | 0.948 | 0.983 | 0.02    | 0.012   | 0.957      |
| Class   | 0.995 | 0.985 | 0.021   | 0.008   | 0.646      |
| Phylum  | 0.819 | 0.877 | 0.378   | 0.324   | 0.746      |

2.2.2 healthy2015 + diseased2015 / ranked test:

| Level   | Ace   | Chao1 | Shannon | Simpson | OTU Number |
|---------|-------|-------|---------|---------|------------|
| OTU     | 0.004 | 0.005 | 0       | 0       | 0.002      |
| Species | 0.141 | 0.186 | 0       | 0       | 0.012      |

|        |       |       |       |       |       |
|--------|-------|-------|-------|-------|-------|
| Genus  | 0.155 | 0.221 | 0     | 0     | 0.013 |
| Family | 0.415 | 0.439 | 0.001 | 0.001 | 0.23  |
| Order  | 0.463 | 0.488 | 0.004 | 0.002 | 0.463 |
| Class  | 0.488 | 0.403 | 0.004 | 0.001 | 0.239 |
| Phylum | 0.24  | 0.239 | 0.322 | 0.322 | 0.426 |

### 2.2.3 2015 Listvyanka + OlkhonGate + Turali / anova:

| Level   | Ace   | Chao1 | Shannon | Simpson | OTU Number |
|---------|-------|-------|---------|---------|------------|
| OTU     | 0.001 | 0     | 0.158   | 0.067   | 0.004      |
| Species | 0.026 | 0.002 | 0.169   | 0.093   | 0.006      |
| Genus   | 0.033 | 0.003 | 0.137   | 0.085   | 0.004      |
| Family  | 0.002 | 0     | 0.113   | 0.088   | 0.001      |
| Order   | 0     | 0     | 0.095   | 0.082   | 0.001      |
| Class   | 0.001 | 0.001 | 0.016   | 0.04    | 0.002      |
| Phylum  | 0.099 | 0.035 | 0.172   | 0.537   | 0.009      |
